# Supplementary material for: Joint Optimization of Collaborative Delivery Routes and Charging Station Locations for Electric Vehicles and Drones
Source: Research Square preprint supplement (doi:10.21203/rs.3.rs-5606746/v1), 2024-12-20
Supplement: Supplementary file 1 [file 08b337f0f65fe00f26893a5c.docx]

| Xi'an | | |
| --- | --- | --- |
| Customer ID | Position | Demand |
| 0 | (43, -92) | 10 |
| 1 | (-50, -58) | 10 |
| 2 | (-63, -85) | 10 |
| 3 | (68, -94) | 10 |
| 4 | (53, 69) | 10 |
| 5 | (-98, 31) | 10 |
| 6 | (-65, -61) | 10 |
| 7 | (9, 34) | 10 |
| 8 | (-70, 63) | 10 |
| 9 | (46, 59) | 10 |
| 10 | (19, -13) | 10 |
| 11 | (-64, -6) | 10 |
| 12 | (30, -49) | 10 |
| 13 | (86, -80) | 10 |
| 14 | (58, -12) | 10 |
| 15 | (-33, -49) | 10 |
| 16 | (-81, -65) | 10 |
| 17 | (75, -34) | 10 |
| 18 | (-94, -97) | 10 |
| 19 | (-23, -96) | 10 |
| 20 | (-29, 96) | 10 |
| 21 | (-32, 34) | 10 |
| 22 | (-53, 86) | 10 |
| 23 | (-3, 17) | 10 |
| 24 | (-24, -100) | 10 |
| 25 | (21, -45) | 10 |
| 26 | (92, 40) | 10 |
| 27 | (100, -28) | 10 |
| 28 | (27, -71) | 10 |
| 29 | (-62, 77) | 10 |
| 30 | (-46, -100) | 10 |
| 31 | (98, -61) | 10 |
| 32 | (-23, -49) | 10 |
| 33 | (-4, 42) | 10 |
| 34 | (93, -27) | 10 |
| 35 | (-79, -26) | 10 |
| 36 | (-30, -67) | 10 |
| 37 | (51, -52) | 10 |
| 38 | (54, 45) | 10 |
| 39 | (42, -77) | 10 |
| 40 | (16, 66) | 10 |
| 41 | (-58, -79) | 10 |
| 42 | (-2, -23) | 10 |
| 43 | (43, 56) | 10 |
| 44 | (22, -64) | 10 |
| 45 | (55, -37) | 10 |
| 46 | (95, 76) | 10 |
| 47 | (-62, 90) | 10 |
| 48 | (-40, -18) | 10 |
| 49 | (63, -40) | 10 |
| 50 | (-66, 47) | 10 |
| 51 | (7, -19) | 10 |
| 52 | (44, -3) | 10 |
| 53 | (-84, -53) | 10 |
| 54 | (-85, -57) | 10 |
| 55 | (70, 23) | 10 |
| 56 | (17, -53) | 10 |
| 57 | (71, 29) | 10 |
| 58 | (29, -18) | 10 |
| 59 | (-28, -64) | 10 |
| 60 | (-85, 10) | 10 |
| 61 | (6, -97) | 10 |
| 62 | (100, -92) | 10 |
| 63 | (-81, 40) | 10 |
| 64 | (-80, 82) | 10 |
| 65 | (54, -12) | 10 |
| 66 | (-22, -23) | 10 |
| 67 | (32, -1) | 10 |
| 68 | (15, -56) | 10 |
| 69 | (21, 100) | 10 |
| 70 | (64, -91) | 10 |
| 71 | (17, 72) | 10 |
| 72 | (-52, 76) | 10 |
| 73 | (-114, 69) | 3 |
| 74 | (108, 19) | 3 |
| 75 | (-12, -112) | 3 |
| 76 | (-113, -97) | 3 |
| 77 | (-114, 23) | 3 |
| 78 | (87, 102) | 3 |
| 79 | (-119, 74) | 3 |
| 80 | (-109, 66) | 3 |
| 81 | (-89, 116) | 3 |
| 82 | (38, 106) | 3 |
| 83 | (60, -103) | 3 |
| 84 | (-109, 49) | 3 |
| 85 | (101, -95) | 3 |
| 86 | (59, 119) | 3 |
| 87 | (-102, 35) | 3 |
| 88 | (-51, 116) | 3 |
| 89 | (78, -106) | 3 |
| 90 | (-112, 86) | 3 |
| 91 | (-52, -104) | 3 |
| 92 | (-66, 113) | 3 |
| 93 | (25, 104) | 3 |
| 94 | (106, 114) | 3 |
| 95 | (-11, 109) | 3 |
| 96 | (73, -108) | 3 |
| 97 | (32, -104) | 3 |
| 98 | (-118, 54) | 3 |
| 99 | (54, 106) | 3 |

| Beijing | | |
| --- | --- | --- |
| Customer ID | Position | Demand |
| 0 | (43, -92) | 10 |
| 1 | (-50, -58) | 10 |
| 2 | (-63, -85) | 10 |
| 3 | (68, -94) | 10 |
| 4 | (53, 69) | 10 |
| 5 | (-98, 31) | 10 |
| 6 | (-65, -61) | 10 |
| 7 | (9, 34) | 10 |
| 8 | (-70, 63) | 10 |
| 9 | (46, 59) | 10 |
| 10 | (19, -13) | 10 |
| 11 | (-64, -6) | 10 |
| 12 | (30, -49) | 10 |
| 13 | (86, -80) | 10 |
| 14 | (58, -12) | 10 |
| 15 | (-33, -49) | 10 |
| 16 | (-81, -65) | 10 |
| 17 | (75, -34) | 10 |
| 18 | (-94, -97) | 10 |
| 19 | (-23, -96) | 10 |
| 20 | (-29, 96) | 10 |
| 21 | (-32, 34) | 10 |
| 22 | (-53, 86) | 10 |
| 23 | (-3, 17) | 10 |
| 24 | (-24, -100) | 10 |
| 25 | (21, -45) | 10 |
| 26 | (92, 40) | 10 |
| 27 | (100, -28) | 10 |
| 28 | (27, -71) | 10 |
| 29 | (-62, 77) | 10 |
| 30 | (-46, -100) | 10 |
| 31 | (98, -61) | 10 |
| 32 | (-23, -49) | 10 |
| 33 | (-4, 42) | 10 |
| 34 | (93, -27) | 10 |
| 35 | (-79, -26) | 10 |
| 36 | (-30, -67) | 10 |
| 37 | (51, -52) | 10 |
| 38 | (54, 45) | 10 |
| 39 | (42, -77) | 10 |
| 40 | (16, 66) | 10 |
| 41 | (-58, -79) | 10 |
| 42 | (-2, -23) | 10 |
| 43 | (43, 56) | 10 |
| 44 | (22, -64) | 10 |
| 45 | (55, -37) | 10 |
| 46 | (95, 76) | 10 |
| 47 | (-62, 90) | 10 |
| 48 | (-40, -18) | 10 |
| 49 | (63, -40) | 10 |
| 50 | (-66, 47) | 10 |
| 51 | (7, -19) | 10 |
| 52 | (44, -3) | 10 |
| 53 | (-84, -53) | 10 |
| 54 | (-85, -57) | 10 |
| 55 | (70, 23) | 10 |
| 56 | (17, -53) | 10 |
| 57 | (71, 29) | 10 |
| 58 | (29, -18) | 10 |
| 59 | (-28, -64) | 10 |
| 60 | (-85, 10) | 10 |
| 61 | (6, -97) | 10 |
| 62 | (100, -92) | 10 |
| 63 | (-81, 40) | 10 |
| 64 | (-80, 82) | 10 |
| 65 | (54, -12) | 10 |
| 66 | (-22, -23) | 10 |
| 67 | (32, -1) | 10 |
| 68 | (15, -56) | 10 |
| 69 | (21, 100) | 10 |
| 70 | (64, -91) | 10 |
| 71 | (17, 72) | 10 |
| 72 | (-52, 76) | 10 |
| 73 | (44, -33) | 10 |
| 74 | (-92, -45) | 10 |
| 75 | (-9, -80) | 10 |
| 76 | (64, -53) | 10 |
| 77 | (8, 75) | 10 |
| 78 | (-75, 9) | 10 |
| 79 | (-44, 95) | 10 |
| 80 | (43, 9) | 10 |
| 81 | (35, -70) | 10 |
| 82 | (-81, -25) | 10 |
| 83 | (75, -79) | 10 |
| 84 | (18, 79) | 10 |
| 85 | (33, -38) | 10 |
| 86 | (92, 86) | 10 |
| 87 | (-42, -59) | 10 |
| 88 | (-100, -99) | 10 |
| 89 | (67, 4) | 10 |
| 90 | (74, 16) | 10 |
| 91 | (76, -88) | 10 |
| 92 | (-88, 48) | 10 |
| 93 | (1, 20) | 10 |
| 94 | (-78, -53) | 10 |
| 95 | (35, -12) | 10 |
| 96 | (18, 73) | 10 |
| 97 | (66, 56) | 10 |
| 98 | (-69, 62) | 10 |
| 99 | (-41, -18) | 10 |
| 100 | (51, 46) | 10 |
| 101 | (-25, -8) | 10 |
| 102 | (-5, -90) | 10 |
| 103 | (-57, -63) | 10 |
| 104 | (21, -62) | 10 |
| 105 | (30, -64) | 10 |
| 106 | (-114, 69) | 3 |
| 107 | (108, 19) | 3 |
| 108 | (-12, -112) | 3 |
| 109 | (-113, -97) | 3 |
| 110 | (-114, 23) | 3 |
| 111 | (87, 102) | 3 |
| 112 | (-119, 74) | 3 |
| 113 | (-109, 66) | 3 |
| 114 | (-89, 116) | 3 |
| 115 | (38, 106) | 3 |
| 116 | (60, -103) | 3 |
| 117 | (-109, 49) | 3 |
| 118 | (101, -95) | 3 |
| 119 | (59, 119) | 3 |
| 120 | (-102, 35) | 3 |
| 121 | (-51, 116) | 3 |
| 122 | (78, -106) | 3 |
| 123 | (-112, 86) | 3 |
| 124 | (-52, -104) | 3 |
| 125 | (-66, 113) | 3 |
| 126 | (25, 104) | 3 |
| 127 | (106, 114) | 3 |
| 128 | (-11, 109) | 3 |
| 129 | (73, -108) | 3 |
| 130 | (32, -104) | 3 |
| 131 | (-118, 54) | 3 |
| 132 | (54, 106) | 3 |
| 133 | (-4, -120) | 3 |
| 134 | (64, 104) | 3 |
| 135 | (113, -93) | 3 |
| 136 | (102, 40) | 3 |
| 137 | (116, 15) | 3 |
| 138 | (115, -120) | 3 |
| 139 | (5, -116) | 3 |
| 140 | (-92, 117) | 3 |
| 141 | (-28, 104) | 3 |
| 142 | (-106, -59) | 3 |
| 143 | (104, 25) | 3 |
| 144 | (88, -103) | 3 |
| 145 | (15, 103) | 3 |
| 146 | (-66, 117) | 3 |
| 147 | (110, 12) | 3 |
| 148 | (-104, -34) | 3 |
| 149 | (-115, 30) | 3 |

Graphical result


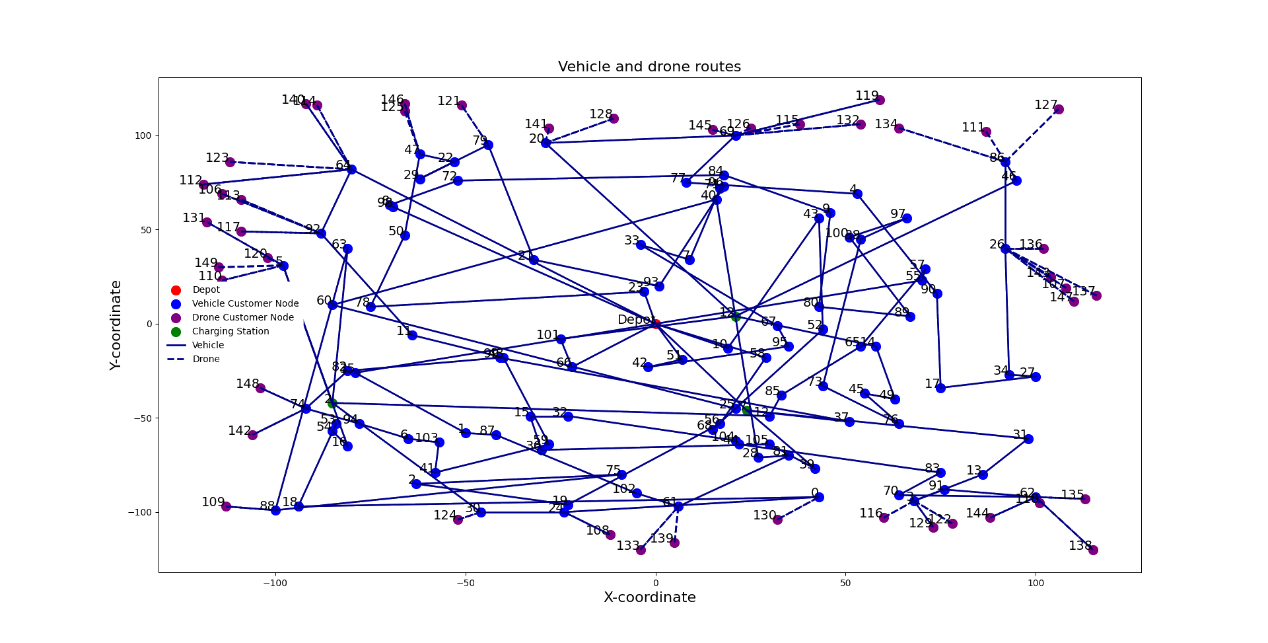


Xi’an


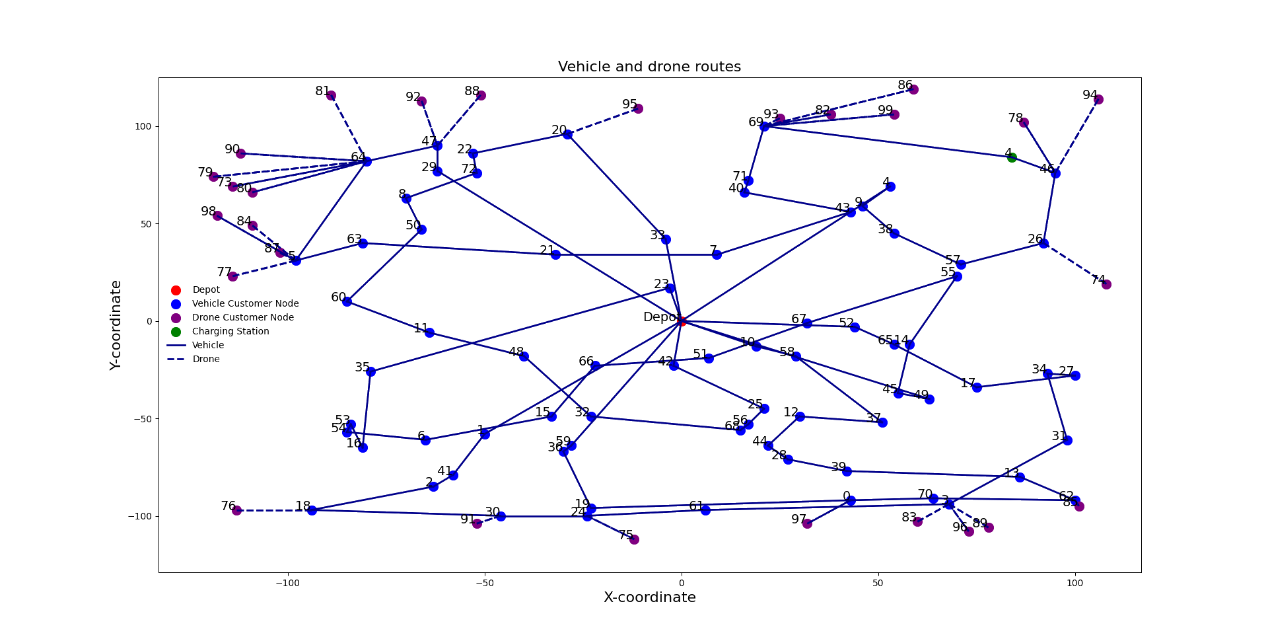


Beijing
